# Supplementary material
Source: HighWire-hosted journal article supplement (http://www.ajevonline.org/highwire/filestream/1943/field_highwire_adjunct_files/0/Supplemental_Data.pdf)
Supplement: Supplemental_Data.pdf [file Supplemental_Data.pdf]

**Supplemental Data for:**

Takase, H., K. Sasaki, H. Shinmori, A. Shinohara, C. Mochizuki, H. Kobayashi, H. Saito, H. Matsuo, S. Suzuki, and R. Takata. 2015. Analysis of rotundone in Japanese Syrah grapes and wines using stir bar sorptive extraction (SBSE) with heart-cutting two-dimensional GC-MS. *Am. J. Enol. Vitic.* 66:398-402. doi: 10.5344/ajev.2015.14118.

---

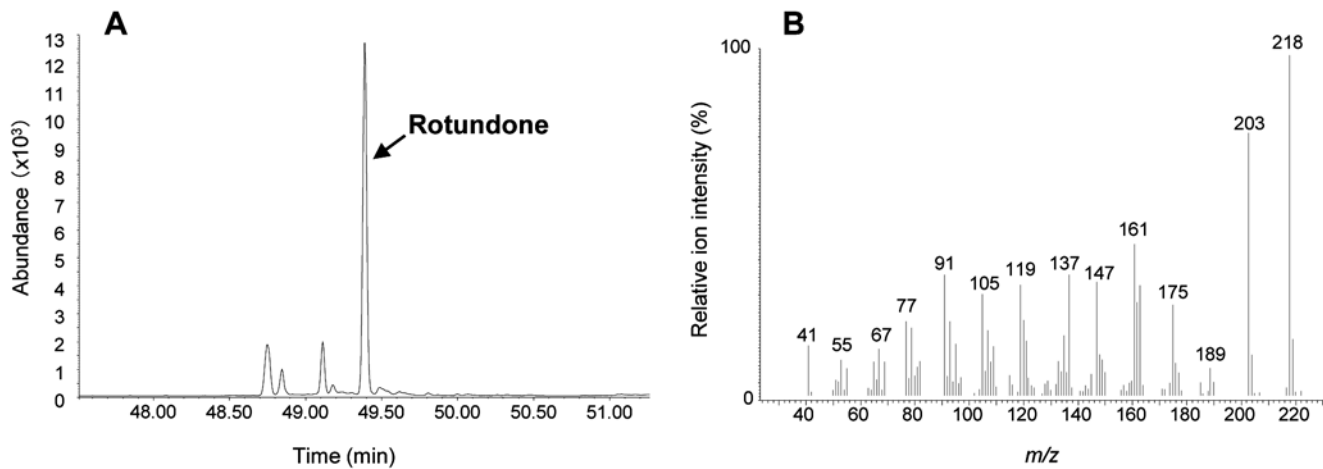

**Supplemental Figure 1** Two-dimensional chromatogram of rotundone. Six hundred ng/L of rotundone was spiked in Cabernet Sauvignon wine. (A) SIM mode ( $m/z$  218). (B) The mass spectrum of rotundone obtained in scan mode at the retention time of 49.39 min.
